# Supplementary material for: An Observation of a Resident-as-Teacher Combined with Tutor Guided Hysteroscopy Teaching Program for Standardized Residency Training (SRT) in Obstetrics and Gynecology
Source: J Healthc Eng. 2020 Jul 30;2020:8855099. doi: 10.1155/2020/8855099 (PMC7414364; doi:10.1155/2020/8855099)
Supplement: Supplementary Materials — The datasets used and analyzed during the current study are available in the Supplementary Information files. [file 8855099.f1.xlsx]

## Sheet: Sheet1
	Patient Age (Year)			Menopause age (Year)			Whole operation time (min)			Volume of distension fluid (ml)			Intrauterine depth (cm)			Uterus position (Case)
Group	Junior Resident	Senior Resident		Junior Resident	Senior Resident		Junior Resident	Senior Resident		Junior Resident	Senior Resident		Junior Resident	Senior Resident			Anterior	Median	Posterior
	53	38		0	0		15	15		400	300		7.5	8.5		Junior Residents	45	4	11
	52	35		0	0		25	15		500	300		7	8.5		Senior Residents	34	8	8
	56	29		3	0		25	20		500	400		7.5	8.5
	65	52		11	0		30	20		600	400		7	7.5
	66	47		12	0		25	25		650	500		6.5	8.5
	45	38		0	0		15	15		400	300		9	9		Post-operative vaginal bleeding (Case)
	64	37		9	0		25	25		500	600		6	8			Little	Medium
	62	46		13	0		30	15		650	350		6	8.5		Junior Residents	59	2
	57	52		5	1		35	15		600	400		6.5	7		Senior Residents	47	3
	59	54		7	2		40	20		700	400		7	6.5
	61	49		11	0		45	20		750	500		7.5	8.5
	56	37		4	0		40	20		800	500		6	8.5		Pathology (Case)
	45	35		0	0		35	15		700	350		8.5	9			Hyperplasia	Polyp	Malignant
	52	65		0	10		35	15		700	400		7	6		Junior Residents	33	28	1
	55	68		4	17		25	35		550	700		6.5	5.5		Senior Residents	29	20	1
	38	34		0	0		25	15		600	350		9.5	8
	42	33		0	0		20	15		550	500		7.5	9.5
	39	43		0	0		35	15		650	500		8.5	9
	32	55		0	3		20	20		500	400		8	8
	37	58		0	7		35	30		650	400		8	7
	44	61		0	11		25	25		650	600		8.5	6.5
	52	49		0	0		25	15		650	450		7	7.5
	45	58		0	6		20	35		600	550		8.5	8
	50	57		0	2		15	20		500	500		7.5	7
	51	49		0	0		20	20		500	550		8	8.5
	45	62		0	11		25	20		600	550		8	6.5
	43	56		0	2		45	25		900	600		8.5	6
	60	50		9	0		35	20		800	550		6	6
	58	57		7	5		45	15		850	300		6	5.5
	44	63		0	10		35	40		750	550		8.5	5.5
	48	60		0	10		30	15		700	450		9	6
	57	53		5	1		30	20		550	450		7	6
	36	54		0	1		30	20		600	600		7.5	6
	37	62		0	7		35	20		600	550		7.5	5.5
	65	47		0	0		25	15		550	350		6	8.5
	39	45		0	0		15	15		400	300		8.5	8
	66	57		13	5		40	15		700	450		7	7
	60	56		6	6		50	30		1000	550		6.5	7
	53	64		1	9		45	25		950	500		5.5	5
	54	63		2	8		35	20		600	450		6	5.5
	56	70		6	26		35	20		600	500		5.5	5
	71	54		21	2		25	20		550	500		5	6
	45	46		0	0		35	20		600	550		8	8.5
	48	44		0	0		30	15		650	450		8.5	9
	50	70		0	22		30	40		650	600		7	4.5
	51	68		0	13		30	25		650	650		7	5
	55	61		1	9		45	25		800	650		7.5	7
	53	54		2	1		25	25		600	600		7	7.5
	54	56		1	3		35	30		650	650		7	7
	39	45		0	0		35	15		650	450		7.5	8
	56			4			20			600			6.5
	53			1			25			700			6
	66			16			15			600			5.5
	67			16			30			650			5.5
	61			11			30			650			6
	59			7			40			750			5.5
	58			8			45			850			6.5
	44			0			25			550			8.5
	45			0			30			650			8.5
	50			0			30			700			7.5
	40			0			40			700			9
	40			0			35			650			8.5
